# Supplementary material for: Neurodevelopmental outcome at 2 years for preterm children born at 22 to 34 weeks’ gestation in France in 2011: EPIPAGE-2 cohort study
Source: PubMed Central journal article supplement — BMJ. 2017 Aug 16;358:j3448. doi: 10.1136/bmj.j3448 (PMC5558213; doi:10.1136/bmj.j3448), 2017-08-16
Supplement: piev037914.ww1.pdf [file piev037914.ww1.pdf]

**Supplemental file 1.** Physician questionnaire to assess the diagnosis of cerebral palsy (in French)

| <b>DEVELOPPEMENT PSYCHOMOTEUR</b>                                                                                                                                                      | <b>Non</b>                   | <b>Oui</b>                   |
|----------------------------------------------------------------------------------------------------------------------------------------------------------------------------------------|------------------------------|------------------------------|
| Comprend une consigne simple                                                                                                                                                           | <input type="checkbox"/>     | <input type="checkbox"/>     |
| Maintient sa tête                                                                                                                                                                      | <input type="checkbox"/>     | <input type="checkbox"/>     |
| S'assied seul(e)                                                                                                                                                                       | <input type="checkbox"/>     | <input type="checkbox"/>     |
| Tient assis(e) sans soutien                                                                                                                                                            | <input type="checkbox"/>     | <input type="checkbox"/>     |
| Se met debout seul(e)                                                                                                                                                                  | <input type="checkbox"/>     | <input type="checkbox"/>     |
| Tient debout sans appui                                                                                                                                                                | <input type="checkbox"/>     | <input type="checkbox"/>     |
| Marche                                                                                                                                                                                 | <input type="checkbox"/>     | <input type="checkbox"/>     |
| Si oui,                                                                                                                                                                                |                              |                              |
| - seul(e) avec bon déroulement des pieds                                                                                                                                               |                              | <input type="checkbox"/>     |
| - seul(e) de façon inhabituelle ( <i>pieds en dedans, boiterie, sur la pointe des pieds...</i> )                                                                                       |                              | <input type="checkbox"/>     |
| - seul(e) avec une démarche chancelante                                                                                                                                                |                              | <input type="checkbox"/>     |
| - avec aide ( <i>le long des murs, en appui sur un meuble, tenu à une main...</i> )                                                                                                    |                              | <input type="checkbox"/>     |
| Age à la marche (en mois écoulés depuis la naissance)                                                                                                                                  | _ _                          |                              |
| <b>PATHOLOGIE NEUROLOGIQUE</b>                                                                                                                                                         | <b>Non</b>                   | <b>Oui</b>                   |
| Episodes convulsifs répétés en dehors des épisodes fébriles ?                                                                                                                          | <input type="checkbox"/>     | <input type="checkbox"/>     |
| Si oui, >1 fois par semaine ?                                                                                                                                                          | <input type="checkbox"/>     | <input type="checkbox"/>     |
| Traitement anticonvulsivant au long cours                                                                                                                                              | <input type="checkbox"/>     | <input type="checkbox"/>     |
| Déficience motrice                                                                                                                                                                     | <input type="checkbox"/>     | <input type="checkbox"/>     |
| Si oui, précisez : .....                                                                                                                                                               |                              |                              |
| Hypotonie axiale                                                                                                                                                                       | <input type="checkbox"/>     | <input type="checkbox"/>     |
| Hypertonie                                                                                                                                                                             | <input type="checkbox"/>     | <input type="checkbox"/>     |
| Si oui, localisation : <input type="checkbox"/> mb supérieur D <input type="checkbox"/> mb supérieur G <input type="checkbox"/> mb inférieur D <input type="checkbox"/> mb inférieur G |                              |                              |
| Autres signes neurologiques anormaux                                                                                                                                                   | <input type="checkbox"/> Non | <input type="checkbox"/> Oui |
| Si oui, précisez : .....                                                                                                                                                               |                              |                              |

A child was considered free of cerebral palsy (CP) if she or he attained all steps of motor development, with a normal gait and normal tone for both trunk and limbs.

A child was considered to have CP if he or she did not attain at least one step of normal development in association with spasticity (“hypertonie”) or generalized hypotonia (“hypotonie axiale”) with extrapyramidal signs (available in “autres signes neurologiques anormaux”).

All ambiguous cases were reviewed by three independent observers, and supplemental information available from the parental questionnaire was used if necessary (for example questions like “does the child need external aids like wheel chair, splints?” together with data from the gross motor domain of the ASQ).
