# Supplementary material for: Neurodevelopmental outcome at 2 years for preterm children born at 22 to 34 weeks’ gestation in France in 2011: EPIPAGE-2 cohort study
Source: PubMed Central journal article supplement — BMJ. 2017 Aug 16;358:j3448. doi: 10.1136/bmj.j3448 (PMC5558213; doi:10.1136/bmj.j3448), 2017-08-16
Supplement: piev037914.ww2.pdf [file piev037914.ww2.pdf]

**Supplemental Table 1.** Type of variable, model used to predict missing data, and percentages of values missing for each variable included in the imputation model (N=4443 survivors at 2 years eligible for follow-up).

| Variable                                                | Type of variable           | Model used to predict missing data | Percentages of values missing |
|---------------------------------------------------------|----------------------------|------------------------------------|-------------------------------|
| Gestational age                                         | Categorical (3 categories) | No missing data                    | 0%                            |
| Maternal age                                            | Categorical (3 categories) | No missing data                    | 0%                            |
| Maternal birth outside France                           | Binary                     | Logistic regression                | 2%                            |
| Parents' socio-economic status†                         | Categorical (6 categories) | Multinomial regression             | 5%                            |
| Primiparous                                             | Binary                     | Logistic regression                | 1%                            |
| Antenatal steroids                                      | Binary                     | Logistic regression                | 2%                            |
| Caesarean section                                       | Binary                     | Logistic regression                | <1%                           |
| Multiple pregnancy                                      | Binary                     | No missing data                    | 0%                            |
| Sex                                                     | Binary                     | Logistic regression                | <1%                           |
| Small-for-gestational age‡                              | Binary                     | Logistic regression                | <1%                           |
| Severe congenital brain malformation                    | Binary                     | No missing data                    | 0%                            |
| Inborn                                                  | Binary                     | No missing data                    | 0%                            |
| Surfactant                                              | Binary                     | Logistic regression                | 1%                            |
| Postnatal steroids                                      | Binary                     | Logistic regression                | 3%                            |
| Severe bronchopulmonary dysplasia§                      | Binary                     | Logistic regression                | 4%                            |
| Severe necrotising enterocolitis§                       | Binary                     | Logistic regression                | 2%                            |
| Severe retinopathy of prematurity§                      | Binary                     | Logistic regression                | 1%                            |
| Severe cerebral lesions§                                | Binary                     | Logistic regression                | 1%                            |
| Breastmilk at discharge                                 | Binary                     | Logistic regression                | 7%                            |
| Cerebral Palsy at 2 years CA                            | Binary                     | Logistic regression                | 19%                           |
| Sensory disabilities at 2 years CA                      | Binary                     | Logistic regression                | 24%                           |
| ASQ Communication score below threshold at 2 years CA   | Binary                     | Logistic regression                | 39%                           |
| ASQ Gross motor score below threshold at 2 years CA     | Binary                     | Logistic regression                | 39%                           |
| ASQ Fine motor score below threshold at 2 years CA      | Binary                     | Logistic regression                | 39%                           |
| ASQ Problem solving score below threshold at 2 years CA | Binary                     | Logistic regression                | 40%                           |
| ASQ Personal-social score below threshold at 2 years CA | Binary                     | Logistic regression                | 39%                           |

All variables were included in the linear predictor of all imputation models, except the variable concerned by imputation

Abbreviations: ASQ, Ages and Stages questionnaire; CA, corrected age

† Defined as the highest occupational status of the mother and father, or mother only if living alone.

‡ Small-for-gestational age was defined as birth weight less than the 10th percentile for gestational age and sex based on French intrauterine "EPOPé" growth curves (Ego 2016).

§ Severe neonatal morbidity was defined as severe bronchopulmonary dysplasia or necrotising enterocolitis stage 2-3 or severe retinopathy of prematurity stage >3 or any of the following severe cerebral abnormalities on cranial ultrasonography: intraventricular haemorrhage grade III or IV or cystic periventricular leukomalacia (Ancel 2015).
