# Supplementary material for: Neurodevelopmental outcome at 2 years for preterm children born at 22 to 34 weeks’ gestation in France in 2011: EPIPAGE-2 cohort study
Source: PubMed Central journal article supplement — BMJ. 2017 Aug 16;358:j3448. doi: 10.1136/bmj.j3448 (PMC5558213; doi:10.1136/bmj.j3448), 2017-08-16
Supplement: piev037914.ww3.pdf [file piev037914.ww3.pdf]

**Supplemental Table 2.** Comparison of live births, with and without parental consent at birth, and children with and without cerebral palsy and Ages and Stages Questionnaire data available at 2 years corrected age for the EPIPAGE-2 study (2011).

|                                                         | Parental consent at birth among live births |        |                 |        | Survivors at 2 years CA eligible for the study |             |         |                    |              |         |           |        |           |        |        |
|---------------------------------------------------------|---------------------------------------------|--------|-----------------|--------|------------------------------------------------|-------------|---------|--------------------|--------------|---------|-----------|--------|-----------|--------|--------|
|                                                         | Yes                                         |        | No <sup>ϕ</sup> |        | Cerebral palsy data available                  |             |         | ASQ data available |              |         |           |        |           |        |        |
|                                                         | n=5170                                      |        | n=397           |        | Yes<br>n=3599                                  | No<br>n=844 | p-value | Yes*<br>n=2506     | No<br>n=1806 | p-value |           |        |           |        |        |
| <b>Gestational age</b>                                  |                                             |        |                 |        |                                                |             |         |                    |              |         |           |        |           |        |        |
| 22-26 weeks                                             | 1055/5170                                   | (7.9)  | 76/397          | (6.0)  | <0.001                                         | 450/3599    | (4.6)   | 95/844             | (3.4)        | <0.001  | 313/2506  | (4.6)  | 207/1806  | (3.8)  | <0.001 |
| 27-31 weeks                                             | 2909/5170                                   | (29.2) | 187/397         | (19.9) |                                                | 2264/3599   | (31.4)  | 445/844            | (21.2)       |         | 1571/2506 | (31.2) | 1043/1806 | (25.5) |        |
| 32-34 weeks                                             | 1206/5170                                   | (62.9) | 134/397         | (74.1) |                                                | 885/3599    | (63.9)  | 304/844            | (75.4)       |         | 622/2506  | (64.2) | 556/1806  | (70.7) |        |
| <b>Maternal characteristics</b>                         |                                             |        |                 |        |                                                |             |         |                    |              |         |           |        |           |        |        |
| <b>Maternal age</b>                                     |                                             |        |                 |        |                                                |             |         |                    |              |         |           |        |           |        |        |
| <25 years                                               | 956/5168                                    | (16.3) | 107/397         | (26.8) | <0.001                                         | 525/3599    | (12.2)  | 258/844            | (28.3)       | <0.001  | 315/2506  | (10.0) | 453/1806  | (23.3) | <0.001 |
| 25-34 years                                             | 3078/5168                                   | (61.3) | 199/397         | (49.2) |                                                | 2236/3599   | (63.6)  | 433/844            | (54.4)       |         | 1592/2506 | (65.1) | 991/1806  | (56.9) |        |
| ≥35 years                                               | 1134/5168                                   | (22.4) | 91/397          | (24.0) |                                                | 838/3599    | (24.1)  | 153/844            | (17.4)       |         | 599/2506  | (24.9) | 362/1806  | (19.8) |        |
| Birth outside of France                                 |                                             |        |                 |        |                                                | 754/3569    | (18.4)  | 214/795            | (26.2)       | <0.001  | 470/2496  | (15.5) | 477/1739  | (26.3) | <0.001 |
| <b>Parents' socio-economic status†</b>                  |                                             |        |                 |        |                                                |             |         |                    |              |         |           |        |           |        |        |
| Professional                                            | 1024/4815                                   | (22.4) | 25/312          | (8.0)  | <0.001                                         | 827/3442    | (25.1)  | 94/760             | (14.5)       | <0.001  | 634/2419  | (26.9) | 257/1656  | (17.3) | <0.001 |
| Intermediate                                            | 990/4815                                    | (21.5) | 49/312          | (13.9) |                                                | 778/3442    | (23.8)  | 105/760            | (14.6)       |         | 589/2419  | (25.1) | 270/1656  | (17.8) |        |
| Administrative, public service, self-employed, students | 1300/4815                                   | (27.1) | 53/312          | (21.7) |                                                | 948/3442    | (28.0)  | 202/760            | (25.6)       |         | 625/2419  | (26.8) | 490/1656  | (28.2) |        |
| Shop assistants, service workers                        | 684/4815                                    | (13.9) | 47/312          | (12.5) |                                                | 458/3442    | (12.5)  | 145/760            | (19.2)       |         | 315/2419  | (12.0) | 273/1656  | (16.3) |        |
| Manual workers                                          | 611/4815                                    | (11.5) | 63/312          | (17.8) |                                                | 356/3442    | (9.0)   | 148/760            | (18.1)       |         | 211/2419  | (7.8)  | 272/1656  | (15.0) |        |
| Unknown occupation                                      | 206/4815                                    | (3.5)  | 75/312          | (26.0) |                                                | 75/3442     | (1.7)   | 66/760             | (7.9)        |         | 45/2419   | (1.4)  | 94/1656   | (5.3)  |        |
| <b>Obstetric factors</b>                                |                                             |        |                 |        |                                                |             |         |                    |              |         |           |        |           |        |        |
| Antenatal steroids                                      |                                             |        |                 |        |                                                | 2937/3535   | (79.5)  | 612/823            | (69.3)       | <0.001  | 2087/2471 | (80.8) | 1359/1757 | (72.7) | <0.001 |
| Caesarean section                                       |                                             |        |                 |        |                                                | 2310/3585   | (60.1)  | 484/831            | (54.7)       | 0.028   | 1640/2500 | (60.9) | 1082/1786 | (56.5) | 0.031  |
| Multiple pregnancy                                      | 1712/5170                                   | (35.1) | 87/397          | (18.0) | <0.001                                         | 1251/3599   | (37.2)  | 245/844            | (29.9)       | 0.002   | 913/2506  | (38.7) | 543/1806  | (31.9) | <0.001 |
| <b>Neonatal factors</b>                                 |                                             |        |                 |        |                                                |             |         |                    |              |         |           |        |           |        |        |
| Male                                                    | 2742/5168                                   | (53.4) | 199/396         | (47.5) | 0.08                                           | 1893/3599   | (52.5)  | 444/843            | (55.6)       | 0.22    | 1315/2506 | (52.7) | 949/1805  | (53.6) | 0.65   |
| Small-for-gestational age‡                              | 1695/5160                                   | (32.6) | 124/389         | (31.3) | 0.68                                           | 1235/3599   | (33.9)  | 267/843            | (29.5)       | 0.057   | 874/2506  | (34.2) | 589/1805  | (31.2) | 0.12   |
| Inborn                                                  |                                             |        |                 |        |                                                | 3184/3599   | (89.0)  | 704/844            | (85.6)       | 0.031   | 2242/2506 | (89.4) | 1537/1806 | (86.9) | 0.056  |
| Surfactant                                              |                                             |        |                 |        |                                                | 1813/3558   | (29.5)  | 382/821            | (28.2)       | 0.52    | 1253/2485 | (29.5) | 850/1765  | (27.8) | 0.29   |
| Postnatal steroids                                      |                                             |        |                 |        |                                                | 237/3497    | (2.9)   | 44/803             | (1.9)        | 0.012   | 153/2432  | (2.6)  | 108/1741  | (2.4)  | 0.45   |
| Severe neonatal morbidities§                            |                                             |        |                 |        |                                                | 445/3423    | (7.0)   | 88/773             | (5.3)        | 0.076   | 284/2380  | (6.2)  | 206/1689  | (6.1)  | 0.91   |
| Breastmilk at discharge                                 |                                             |        |                 |        |                                                | 1769/3382   | (56.8)  | 313/736            | (50.3)       | 0.012   | 1280/2361 | (58.1) | 752/1635  | (52.5) | 0.008  |

Abbreviation: CA, corrected age; ASQ, ages and stages questionnaire.

Complete cases analysis. Data are number of events/number in group (percentages). Percentages are weighted to account for differences in sampling process between gestational ages. Denominators vary according to the number of missing data for each variable.

<sup>ϕ</sup> For children whose parents refused inclusion in the study, status at birth, mortality and limited perinatal data were available (Ancel 2014)

\* Infants with cerebral palsy, deafness, blindness or severe congenital anomalies were excluded (n=131).

† Defined as the highest occupational status of the mother and father, or mother only if living alone.

‡ Small-for-gestational age was defined as birth weight less than the 10th percentile for gestational age and sex based on French intrauterine "EPOPé" growth curves (Ego 2016).

§ Severe neonatal morbidity was defined as severe bronchopulmonary dysplasia or necrotising enterocolitis stage 2-3 or severe retinopathy of prematurity stage >3 or any of the following severe cerebral abnormalities on cranial ultrasonography: intraventricular haemorrhage grade III or IV or cystic periventricular leukomalacia (Ancel 2015).
