# Supplementary material for: Neurodevelopmental outcome at 2 years for preterm children born at 22 to 34 weeks’ gestation in France in 2011: EPIPAGE-2 cohort study
Source: PubMed Central journal article supplement — BMJ. 2017 Aug 16;358:j3448. doi: 10.1136/bmj.j3448 (PMC5558213; doi:10.1136/bmj.j3448), 2017-08-16
Supplement: piev037914.ww4.pdf [file piev037914.ww4.pdf]

**Supplemental Table 3.** Characteristics of children with cerebral palsy data available at 2 years corrected age by gestational age group.

|                                                            | 24-31 weeks *<br>(n=2714) |        | 24-26 weeks *<br>(n=450) |        | 27-31 weeks<br>(n=2264) |        | 32-34 weeks<br>(n=885) |        | p-value** |
|------------------------------------------------------------|---------------------------|--------|--------------------------|--------|-------------------------|--------|------------------------|--------|-----------|
| <b>Maternal characteristics</b>                            |                           |        |                          |        |                         |        |                        |        |           |
| Maternal age                                               |                           |        |                          |        |                         |        |                        |        |           |
| <25 years                                                  | 436/2714                  | (16.1) | 69/450                   | (15.3) | 367/2264                | (16.2) | 89/885                 | (10.1) | <0.001    |
| 25-34 years                                                | 1660/2714                 | (61.1) | 281/450                  | (62.4) | 1379/2264               | (60.9) | 576/885                | (65.1) |           |
| ≥35 years                                                  | 618/2714                  | (22.8) | 100/450                  | (22.2) | 518/2264                | (22.9) | 220/885                | (24.9) |           |
| Birth outside of France                                    | 613/2689                  | (22.6) | 118/445                  | (26.5) | 495/2244                | (22.1) | 141/880                | (16.0) | <0.001    |
| Parents' socio-economic status†                            |                           |        |                          |        |                         |        |                        |        |           |
| Professional                                               | 606/2595                  | (23.3) | 107/429                  | (24.9) | 499/2166                | (23.0) | 221/847                | (26.1) | <0.001    |
| Intermediate                                               | 568/2595                  | (21.9) | 89/429                   | (20.7) | 479/2166                | (22.1) | 210/847                | (24.8) |           |
| Administrative, public service,<br>self-employed, students | 708/2595                  | (27.4) | 101/429                  | (23.5) | 607/2166                | (28.0) | 240/847                | (28.3) |           |
| Shop assistants, service workers                           | 358/2595                  | (13.7) | 73/429                   | (17.0) | 285/2166                | (13.2) | 100/847                | (11.8) |           |
| Manual workers                                             | 291/2595                  | (11.2) | 46/429                   | (10.7) | 245/2166                | (11.3) | 65/847                 | (7.7)  |           |
| No known occupation                                        | 64/2595                   | (2.4)  | 13/429                   | (3.0)  | 51/2166                 | (2.4)  | 11/847                 | (1.3)  |           |
| <b>Obstetric factors</b>                                   |                           |        |                          |        |                         |        |                        |        |           |
| Antenatal steroids                                         | 2276/2667                 | (85.4) | 370/443                  | (83.5) | 1906/2224               | (85.7) | 661/868                | (76.2) | <0.001    |
| Caesarean section                                          | 1818/2701                 | (68.1) | 226/447                  | (50.6) | 1592/2254               | (70.6) | 492/884                | (55.7) | <0.001    |
| Multiple pregnancy                                         | 902/2714                  | (33.3) | 144/450                  | (32.0) | 758/2264                | (33.5) | 349/885                | (39.4) | <0.001    |
| <b>Neonatal factors</b>                                    |                           |        |                          |        |                         |        |                        |        |           |
| Male                                                       | 1429/2714                 | (52.8) | 227/450                  | (50.4) | 1202/2264               | (53.1) | 464/885                | (52.4) | 0.76      |
| Small-for-gestational age‡                                 | 942/2714                  | (35.3) | 92/450                   | (20.4) | 850/2264                | (37.5) | 293/885                | (33.1) | <0.001    |
| Inborn                                                     | 2393/2714                 | (88.2) | 393/450                  | (87.3) | 2000/2264               | (88.3) | 791/885                | (89.4) | 0.46      |
| Surfactant                                                 | 1719/2687                 | (62.5) | 429/443                  | (96.8) | 1290/2244               | (57.5) | 94/871                 | (10.8) | <0.001    |
| Postnatal steroids                                         | 237/2632                  | (8.0)  | 139/438                  | (31.7) | 98/2194                 | (4.5)  | 0/865                  | (0.0)  | <0.001    |
| Severe neonatal morbidity§                                 | 427/2581                  | (15.5) | 168/426                  | (39.4) | 259/2155                | (12.0) | 18/842                 | (2.1)  | <0.001    |
| Breastmilk at discharge                                    | 1267/2556                 | (49.9) | 174/420                  | (41.4) | 1093/2136               | (51.2) | 502/826                | (60.8) | <0.001    |

Complete cases analysis. Data are number of events/number in group (percentages). Denominators vary according to the number of missing data for each variable. Percentages are weighted to take into account differences in sampling process between gestational age groups.

\* Including one survivor born at 23 weeks + 6 days.

\*\* Comparison between gestational age groups 24-26 weeks / 27-31 weeks / 32-34 weeks.

† Defined as the highest occupational status of the mother and father, or mother only if living alone.

‡ Small-for-gestational age was defined as birth weight <10th percentile for gestational age and sex based on French intrauterine "EPOPé" growth curves (Ego 2016).

§ Severe neonatal morbidity was defined as severe bronchopulmonary dysplasia or necrotising enterocolitis stage 2-3 or severe retinopathy of prematurity stage >3 or any of the following severe cerebral abnormalities on cranial ultrasonography: intraventricular haemorrhage grade III or IV or cystic periventricular leukomalacia (Ancel 2015).
