# Supplementary material for: Neurodevelopmental outcome at 2 years for preterm children born at 22 to 34 weeks’ gestation in France in 2011: EPIPAGE-2 cohort study
Source: PubMed Central journal article supplement — BMJ. 2017 Aug 16;358:j3448. doi: 10.1136/bmj.j3448 (PMC5558213; doi:10.1136/bmj.j3448), 2017-08-16
Supplement: piev037914.ww5.pdf [file piev037914.ww5.pdf]

**Supplemental Table 4.** Survival, rates of cerebral palsy and Ages and Stages Questionnaire below threshold at 2 years corrected age by week of gestation in neonates born between 24 and 26 weeks.

|                                                                     | 24 weeks* |                     | 25 weeks |                     | 26 weeks |                     | p-value† |  |
|---------------------------------------------------------------------|-----------|---------------------|----------|---------------------|----------|---------------------|----------|--|
| <b>Live births</b>                                                  |           |                     |          |                     |          |                     |          |  |
| Survival at 2 years CA                                              | 59/187    | 31.6 (25.0 to 38.7) | 181/308  | 58.8 (53.0 to 64.3) | 305/413  | 73.8 (69.3 to 78.0) | <0.001   |  |
| Survival without neuro-motor or sensory disability at 2 years CA‡,§ |           | 29.3 (22.6 to 35.9) |          | 54.6 (48.8 to 60.3) |          | 69.8 (65.2 to 74.3) | <0.001   |  |
| <b>Survivors at 2 years CA</b>                                      |           |                     |          |                     |          |                     |          |  |
| Cerebral palsy                                                      | 5/51      | 9.8 (3.3 to 21.4)   | 15/142   | 10.6 (6.0 to 16.8)  | 11/257   | 4.3 (2.2 to 7.5)    | 0.041    |  |
| Deafness                                                            | 1/50      | 2.0 (0.1 to 10.6)   | 2/139    | 1.4 (0.2 to 5.1)    | 3/253    | 1.2 (0.2 to 3.4)    | 0.90     |  |
| Blindness                                                           | 0/50      | 0.0 -               | 1/130    | 0.8 (0.0 to 4.2)    | 2/241    | 0.8 (0.1 to 3.0)    | 0.81     |  |
| Neuro-motor or sensory disability§                                  | 3/49      | 6.1 (1.3 to 16.9)   | 9/131    | 6.9 (3.2 to 12.6)   | 13/240   | 5.4 (2.9 to 9.1)    | 0.85     |  |
| Total ASQ score (median[IQR])                                       | 35        | 220 [175 to 245]    | 92       | 215 [180 to 242]    | 186      | 230 [185 to 255]    | 0.12     |  |
| ASQ below threshold¶                                                | 24/35     | 68.6 (50.7 to 83.1) | 47/92    | 51.1 (40.4 to 61.7) | 86/186   | 46.2 (38.9 to 53.7) | 0.052    |  |
| No. of domains below threshold                                      |           |                     |          |                     |          |                     |          |  |
| 0                                                                   | 11/35     | 31.4 (16.9 to 49.3) | 45/92    | 48.9 (38.3 to 59.6) | 100/186  | 53.8 (46.3 to 61.1) |          |  |
| 1                                                                   | 14/35     | 40.0 (23.9 to 57.9) | 22/92    | 23.9 (15.6 to 33.9) | 40/186   | 21.5 (15.8 to 28.1) |          |  |
| 2                                                                   | 4/35      | 11.4 (3.2 to 26.7)  | 13/92    | 14.1 (7.7 to 23.0)  | 21/186   | 11.3 (7.1 to 16.7)  |          |  |
| 3                                                                   | 0/35      | 0.0 -               | 7/92     | 7.6 (3.1 to 15.1)   | 12/186   | 6.5 (3.4 to 11.0)   |          |  |
| 4/5                                                                 | 6/35      | 17.1 (6.6 to 33.6)  | 5/92     | 5.4 (1.8 to 12.2)   | 13/186   | 7.0 (3.8 to 11.7)   |          |  |
| By domain                                                           |           |                     |          |                     |          |                     |          |  |
| Communication                                                       | 16/35     | 45.7 (28.8 to 63.4) | 27/92    | 29.3 (20.3 to 39.8) | 63/186   | 33.9 (27.1 to 41.2) |          |  |
| Gross motor                                                         | 10/35     | 28.6 (14.6 to 46.3) | 13/92    | 14.1 (7.7 to 23.0)  | 29/186   | 15.6 (10.7 to 21.6) |          |  |
| Fine motor                                                          | 7/35      | 20.0 (8.4 to 36.9)  | 9/92     | 9.8 (4.6 to 17.8)   | 22/186   | 11.8 (7.6 to 17.4)  |          |  |
| Problem solving                                                     | 7/35      | 20.0 (8.4 to 36.9)  | 12/92    | 13.0 (6.9 to 21.7)  | 21/186   | 11.3 (7.1 to 16.7)  |          |  |
| Personal-social                                                     | 8/35      | 22.9 (10.4 to 40.1) | 29/92    | 31.5 (22.2 to 42)   | 41/186   | 22.0 (16.3 to 28.7) |          |  |

Abbreviation: CA, corrected age; ASQ, ages and stages questionnaire; IQR, interquartile range.

Complete case analysis unless noted. Data are number of events/number in group and % (exact 95% confidence intervals), unless otherwise noted. Denominators vary according to the number of missing data for each variable.

\* Including one survivor born at 23 weeks + 6 days.

† Comparison between gestational age weeks.

‡ Results based on multiple imputed data.

§ Severe or moderate neuro-motor or sensory disability: severe = cerebral palsy GMFCS levels 3-5 and/or bilateral deafness and/or bilateral blindness; moderate = cerebral palsy GMFCS level-2 and/or unilateral deafness and/or unilateral blindness. Six infants had associated severe or moderate cerebral palsy and sensory disabilities.

¶ For each domain, a score lower than 2 standard deviations from the mean, using established screening cut-off points (Squire, 2009) was reported. If a score was below threshold in at least one domain, the global ASQ was considered below threshold.
