# Supplementary material for: Neurodevelopmental outcome at 2 years for preterm children born at 22 to 34 weeks’ gestation in France in 2011: EPIPAGE-2 cohort study
Source: PubMed Central journal article supplement — BMJ. 2017 Aug 16;358:j3448. doi: 10.1136/bmj.j3448 (PMC5558213; doi:10.1136/bmj.j3448), 2017-08-16
Supplement: piev037914.ww6.pdf [file piev037914.ww6.pdf]

**Supplemental Table 5:** Survival and survival without neuro-motor or sensory disabilities for children included in the 9 regions participating in both EPIPAGE (1997) and EPIPAGE-2 (2011) studies by weeks' gestational age.

|                                                                            | 1997    |                      | 2011 (EPIPAGE-1 regions) |                      | Adjusted difference<br>2011 v 1997* | p-<br>value |
|----------------------------------------------------------------------------|---------|----------------------|--------------------------|----------------------|-------------------------------------|-------------|
| <b>Live births</b>                                                         |         |                      |                          |                      |                                     |             |
| <b>Survivors at 2 years CA</b>                                             |         |                      |                          |                      |                                     |             |
| 22-23 weeks                                                                | 0/46    | 0.0 -                | 0/76                     | 0.0 -                | 0.0 -                               |             |
| 24 weeks                                                                   | 13/42   | 32.7 (18.5-49.7)     | 28/96                    | 29.2 (20.3-39.3)     | -0.6 (-17.0 to 15.8)                | 0.94        |
| 25 weeks                                                                   | 59/119  | 49.3 (39.6-59.1)     | 98/163                   | 60.1 (52.2-67.7)     | 10.0 (-1.0 to 21.1)                 | 0.075       |
| 26 weeks                                                                   | 88/158  | 55.9 (47.4-64.2)     | 133/184                  | 72.3 (65.2-78.6)     | 14.6 (5.3 to 23.9)                  | 0.002       |
| 27 weeks                                                                   | 162/230 | 69.1 (62.2-75.4)     | 142/170                  | 83.5 (77.1-88.8)     | 14.6 (7.4 to 21.8)                  | <0.001      |
| 28 weeks                                                                   | 222/285 | 77.7 (72.1-82.7)     | 193/215                  | 89.8 (84.9-93.5)     | 10.5 (4.6 to 16.4)                  | <0.001      |
| 29 weeks                                                                   | 242/273 | 88.1 (83.2-91.9)     | 217/226                  | 96.0 (92.6-98.2)     | 7.4 (3.4 to 11.5)                   | <0.001      |
| 30 weeks                                                                   | 380/419 | 90.6 (87.2-93.4)     | 307/318                  | 96.5 (93.9-98.3)     | 4.7 (1.6 to 7.8)                    | 0.003       |
| 31 weeks                                                                   | 524/551 | 95.2 (92.9-96.9)     | 402/413                  | 97.3 (95.3-98.7)     | 2.5 (0.5 to 4.6)                    | 0.016       |
| 32 weeks                                                                   | 751/778 | 96.1 (93.9-97.7)     | 117/120                  | 97.5 (92.9-99.5)     | 0.8 (-1.4 to 3.0)                   | 0.49        |
| 33 weeks                                                                   | 196/203 | 96.3 (92.2-98.6)     | 138/141                  | 97.9 (93.9-99.6)     | 1.1 (-1.8 to 4.1)                   | 0.45        |
| 34 weeks                                                                   | 228/230 | 98.9 (95.7-99.9)     | 289/296                  | 97.6 (95.2-99.0)     | -1.4 (-3.6 to 0.9)                  | 0.23        |
| <b>Survivors without neuro-motor or sensory disabilities at 2 years CA</b> |         |                      |                          |                      |                                     |             |
| 22-23 weeks                                                                |         | 0.0                  |                          | 0.0 -                | -                                   |             |
| 24 weeks                                                                   |         | 29.0 (12.3 to 45.7)  |                          | 25.8 (16.9 to 34.6)  | -1.9 (-18.9 to 15.2)                | 0.83        |
| 25 weeks                                                                   |         | 43.5 (34.0 to 53.1)  |                          | 55.4 (47.6 to 63.2)  | 12.7 (1.3 to 24.0)                  | 0.028       |
| 26 weeks                                                                   |         | 46.9 (38.6 to 55.3)  |                          | 68.5 (61.6 to 75.4)  | 21.6 (11.8 to 31.3)                 | <0.001      |
| 27 weeks                                                                   |         | 64.3 (57.6 to 71.0)  |                          | 77.8 (71.3 to 84.3)  | 14.5 (6.4 to 22.7)                  | <0.001      |
| 28 weeks                                                                   |         | 72.0 (66.4 to 77.6)  |                          | 85.5 (80.5 to 90.5)  | 12.1 (5.5 to 18.7)                  | 0.003       |
| 29 weeks                                                                   |         | 80.9 (75.7 to 86.2)  |                          | 91.4 (87.5 to 95.2)  | 10.3 (4.5 to 15.8)                  | 0.003       |
| 30 weeks                                                                   |         | 87.6 (84.2 to 91.0)  |                          | 93.5 (90.5 to 96.4)  | 4.8 (0.7 to 9.0)                    | 0.028       |
| 31 weeks                                                                   |         | 91.2 (88.5 to 93.8)  |                          | 95.0 (92.8 to 97.2)  | 3.7 (0.7 to 6.7)                    | 0.017       |
| 32 weeks                                                                   |         | 93.8 (91.4 to 96.2)  |                          | 97.0 (93.5 to 100.0) | 3.3 (-0.3 to 6.9)                   | 0.076       |
| 33 weeks                                                                   |         | 94.8 (91.2 to 98.3)  |                          | 97.5 (94.8 to 100.0) | 2.5 (-0.7 to 5.7)                   | 0.13        |
| 34 weeks                                                                   |         | 98.2 (96.0 to 100.0) |                          | 96.4 (94.0 to 98.9)  | -2.0 (-4.0 to 0.1)                  | 0.063       |

Abbreviation: CA, corrected age

Data are number of events/number in group and % (exact 95% binomial confidence intervals). Percentages are weighted to account for differences in sampling process between gestational age groups.

\* Risk differences were estimated using a binomial model with identity link.

† Adjusted for gender, single or multiple pregnancy, small-for-gestational age and parents' socio-economic status.

‡ Complete cases analysis. No survivors at 22-23 weeks in the 9 regions participating in both EPIPAGE studies.

§ Results based on data using multiple imputation. Moderate or severe neuro-motor or sensory disabilities. Severe neuro-motor or sensory disabilities: cerebral palsy GMFCS levels 3-5 and/or bilateral deafness and/or bilateral blindness; moderate neuro-motor or sensory disabilities: cerebral palsy GMFCS level-2 and/or unilateral deafness and/or unilateral blindness.
