# Supplementary material for: Neurodevelopmental outcome at 2 years for preterm children born at 22 to 34 weeks’ gestation in France in 2011: EPIPAGE-2 cohort study
Source: PubMed Central journal article supplement — BMJ. 2017 Aug 16;358:j3448. doi: 10.1136/bmj.j3448 (PMC5558213; doi:10.1136/bmj.j3448), 2017-08-16
Supplement: piev037914.ww7.pdf [file piev037914.ww7.pdf]

**Supplemental Table 6.** Factors associated with cerebral palsy and Ages and Stages Questionnaire scores below threshold at 2 years corrected age for children born between 24-31 weeks gestation.

|                                                            | Cerebral palsy | Model 1<br>aOR (95%CI) | p-value | Model 2<br>aOR (95%CI) | p-value | ASQ scores below<br>threshold† | Model 1<br>aOR (95%CI) | p-value | Model 2<br>aOR (95%CI) | p-value |
|------------------------------------------------------------|----------------|------------------------|---------|------------------------|---------|--------------------------------|------------------------|---------|------------------------|---------|
| <b>Gestational age (weeks)</b>                             |                |                        |         |                        |         |                                |                        |         |                        |         |
| 24 *                                                       | 5/51 (9.8)     | 4.4 (1.5 to 12.4)      | <0.001  | 3.3 (1.0 to 10.2)      | 0.010   | 24/35 (68.6)                   | 3.4 (1.6 to 7.1)       | 0.020   | 3.6 (1.7 to 7.8)       | 0.012   |
| 25                                                         | 15/142 (10.6)  | 4.8 (2.3 to 9.8)       |         | 4.0 (1.9 to 8.3)       |         | 47/92 (51.1)                   | 1.6 (1.0 to 2.6)       |         | 1.7 (1.1 to 2.7)       |         |
| 26                                                         | 11/257 (4.3)   | 1.8 (0.8 to 3.9)       |         | 1.7 (0.8 to 3.7)       |         | 86/186 (46.2)                  | 1.3 (0.9 to 1.9)       |         | 1.3 (0.9 to 1.9)       |         |
| 27                                                         | 22/279 (7.9)   | 3.4 (1.8 to 6.6)       |         | 2.8 (1.4 to 5.6)       |         | 82/183 (44.8)                  | 1.2 (0.9 to 1.7)       |         | 1.1 (0.7 to 1.5)       |         |
| 28                                                         | 16/340 (4.7)   | 2.0 (1.0 to 4.0)       |         | 1.8 (0.9 to 3.7)       |         | 94/240 (39.2)                  | 1.0 (0.7 to 1.4)       |         | 0.9 (0.7 to 1.3)       |         |
| 29                                                         | 21/405 (5.2)   | 2.2 (1.1 to 4.2)       |         | 1.9 (1.0 to 3.6)       |         | 110/268 (41.0)                 | 1.1 (0.8 to 1.5)       |         | 1.1 (0.8 to 1.5)       |         |
| 30                                                         | 21/538 (3.9)   | 1.6 (0.9 to 3.1)       |         | 1.6 (0.8 to 3.0)       |         | 159/384 (41.4)                 | 1.1 (0.8 to 1.4)       |         | 1.0 (0.8 to 1.4)       |         |
| 31                                                         | 17/702 (2.4)   | 1                      |         | 1                      |         | 195/496 (39.3)                 | 1                      |         | 1                      |         |
| <b>Sex</b>                                                 |                |                        |         |                        |         |                                |                        |         |                        |         |
| Female                                                     | 57/1285 (4.3)  | 1                      | 0.52    | 1                      | 0.53    | 322/897 (35.6)                 | 1                      | <0.001  | 1                      | <0.001  |
| Male                                                       | 71/1429 (4.9)  | 1.1 (0.8 to 1.6)       |         | 1.1 (0.8 to 1.6)       |         | 475/987 (47.7)                 | 1.7 (1.4 to 2.1)       |         | 1.8 (1.5 to 2.2)       |         |
| <b>Pregnancy</b>                                           |                |                        |         |                        |         |                                |                        |         |                        |         |
| Single                                                     | 92/1812 (4.9)  | 1                      | 0.17    | 1                      | 0.24    | 509/1224 (41.4)                | 1                      | 0.30    | 1                      | 0.12    |
| Multiple                                                   | 36/902 (4.0)   | 0.8 (0.5 to 1.1)       |         | 0.8 (0.5 to 1.2)       |         | 288/660 (43.0)                 | 1.1 (0.9 to 1.3)       |         | 1.2 (1.0 to 1.4)       |         |
| <b>Small-for-gestational age‡</b>                          |                |                        |         |                        |         |                                |                        |         |                        |         |
| No                                                         | 97/1772 (5.4)  | 1                      | 0.048   | 1                      | 0.04    | 496/1216 (40.4)                | 1                      | 0.015   | 1                      | 0.010   |
| Yes                                                        | 31/942 (3.2)   | 0.7 (0.4 to 1.0)       |         | 0.6 (0.4 to 1.0)       |         | 301/668 (44.7)                 | 1.3 (1.0 to 1.5)       |         | 1.3 (1.1 to 1.6)       |         |
| <b>Parents' socio-economic status§</b>                     |                |                        |         |                        |         |                                |                        |         |                        |         |
| Professional                                               | 26/606 (4.3)   | 1                      | 0.46    | 1                      | 0.42    | 177/468 (37.5)                 | 1                      | 0.003   | 1                      | 0.009   |
| Intermediate                                               | 27/568 (4.5)   | 1.1 (0.6 to 1.9)       |         | 1.1 (0.6 to 1.9)       |         | 170/434 (38.9)                 | 1.1 (0.8 to 1.4)       |         | 1.1 (0.8 to 1.4)       |         |
| Administrative, public service,<br>self-employed, students | 29/708 (4.1)   | 1.0 (0.6 to 1.7)       |         | 1.0 (0.6 to 1.7)       |         | 197/458 (42.8)                 | 1.3 (1.0 to 1.7)       |         | 1.3 (1.0 to 1.6)       |         |
| Shop assistants, service workers                           | 14/358 (3.7)   | 0.9 (0.4 to 1.7)       |         | 0.8 (0.4 to 1.6)       |         | 124/248 (49.9)                 | 1.7 (1.3 to 2.4)       |         | 1.7 (1.2 to 2.4)       |         |
| Manual workers                                             | 20/291 (6.6)   | 1.6 (0.9 to 2.9)       |         | 1.6 (0.9 to 2.9)       |         | 73/169 (42.1)                  | 1.3 (0.9 to 1.9)       |         | 1.3 (0.9 to 1.8)       |         |
| No known occupation                                        | 5/64 (7.0)     | 1.7 (0.6 to 4.7)       |         | 1.8 (0.6 to 4.9)       |         | 22/39 (56.9)                   | 2.4 (1.2 to 4.6)       |         | 2.2 (1.1 to 4.2)       |         |

Abbreviation: ASQ, ages and stages questionnaire.

Complete case analysis. Data are number of events/number in groups (percentages), odds ratio (exact 95% binomial confidence intervals). Denominators vary according to the number of missing data for each variable. Percentages are weighted to take into account differences in sampling process between gestational age groups.

Model 1: adjusted for gestational age and, for ASQ only, for age at evaluation in completed months.

Model 2: adjusted for gestational age, sex, single or multiple pregnancy, small-for-gestational age and parents' socio-economic status and, for ASQ only, for age at evaluation in completed months.

\* Including one survivor born at 23 weeks + 6 days.

†For each domain, a score lower than 2 standard deviations from the mean, using established screening cut-off points (Squire, 2009), was reported. If a score was below threshold in at least one domain, the global ASQ was considered below threshold.. Infants with cerebral palsy, deafness, blindness or severe congenital brain anomalies are excluded (n=131).

‡ Small-for- gestational age was defined as birth weight <10th percentile for gestational age and sex based on French intrauterine "EPOPé" growth curves (Ego 2016).

§ Defined as the highest occupational status of the mother and father, or mother only if living alone.
