# Supplementary material for: Neurodevelopmental outcome at 2 years for preterm children born at 22 to 34 weeks’ gestation in France in 2011: EPIPAGE-2 cohort study
Source: PubMed Central journal article supplement — BMJ. 2017 Aug 16;358:j3448. doi: 10.1136/bmj.j3448 (PMC5558213; doi:10.1136/bmj.j3448), 2017-08-16
Supplement: piev037914.ww8.pdf [file piev037914.ww8.pdf]

**Supplemental Figure 1.** Total Ages and Stages Questionnaire scores at 2 years corrected age by number of domains below threshold according to established reference (Squire, 2009).

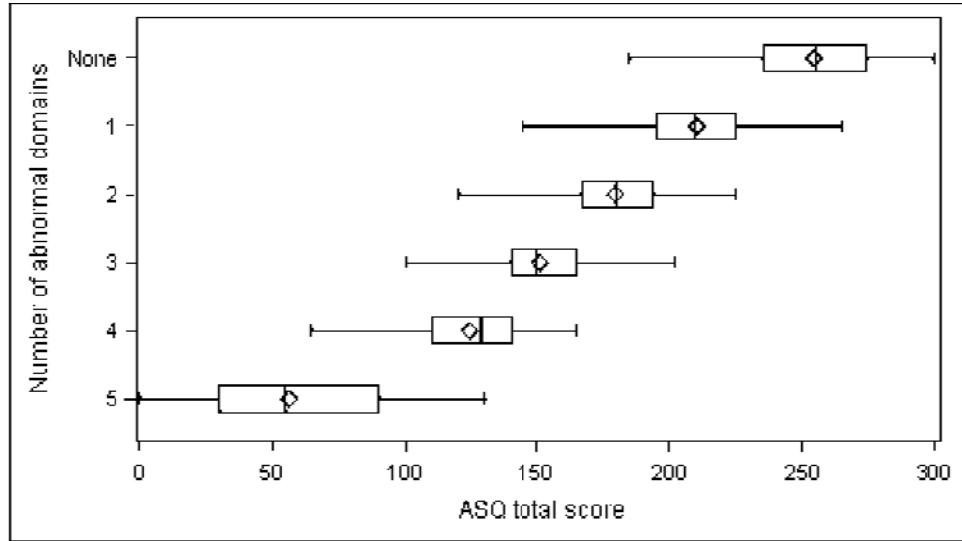

Abbreviation: ASQ, Ages and Stages Questionnaire.

The marker inside the box indicates the mean value and the line the median value of the total ASQ score. The left and right edges of the box represent the interquartile range of the total median ASQ score. The whiskers, extended from each box, indicate the entire range of values, including outliers.
