# Supplementary material for: Neurodevelopmental outcome at 2 years for preterm children born at 22 to 34 weeks’ gestation in France in 2011: EPIPAGE-2 cohort study
Source: PubMed Central journal article supplement — BMJ. 2017 Aug 16;358:j3448. doi: 10.1136/bmj.j3448 (PMC5558213; doi:10.1136/bmj.j3448), 2017-08-16
Supplement: piev037914.ww9.pdf [file piev037914.ww9.pdf]

## **EPIPAGE-2 writing group**

**D. Astruc**, Department of Neonatology, University Hospital, Strasbourg, France, **P. Kuhn**, Department of Neonatology, University Hospital, Strasbourg, France, **J. Matis**, Department of Neonatology, University Hospital, Strasbourg, France, **L. Joly**, Department of Neonatology, University Hospital, Bordeaux, France, **G. Mazeira**, Department of Neonatology, La Côte Basque Hospital, Bayonne, France, **A. David**, Department of Neonatology, University Hospital, Pau, France, **B. Lecomte**, University Hospital Estaing, Clermont-Ferrand, France, **F. Vendittelli**, University Hospital Estaing, Clermont-Ferrand, France, **V. Datin-Dorriere**, Department of Neonatology, University Hospital, Caen, France, **B. Guillois**, Department of Neonatology, University Hospital, Caen; University of Caen Normandie, UFR de Médecine, PFRS, Caen, France, **A. Burguet**, Department of Neonatal Pediatrics, University Hospital, Dijon, France, **P. Sagot**, Department of Gynecology and Obstetrics, University Hospital, Dijon, France, **JM. Roué**, Department of Neonatology, University Hospital, Brest, France, **A. Beuchée**, Department of Neonatology, University Hospital, Rennes, France; CIC INSERM U1414, Rennes 1 University, Rennes, France, **F. Rouget**, Department of Pediatrics, University Hospital, Rennes, France; INSERM-IRSET U1085, Rennes, France, **E. Saliba**, Neonatal Intensive Care, University Hospital Clocheville, Tours, France; INSERM U930, François Rabelais University, Tours, France, **A. Favreau**, Neonatology, University Hospital Clocheville, Tours, France, **N. Bednarek**, Department of Neonatal Pediatrics, University Hospital, Reims, France, **G. Loron**, Department of Neonatal Pediatrics, University Hospital, Reims, France, **C. Mougey**, Department of Neonatology, University Hospital, Besançon, France, **G. Thiriez**, Department of Neonatology, University Hospital, Besançon, France, **S. Marret**, Department of Neonatal Pediatrics and Intensive Care, University Hospital, Rouen, France; Laboratory of microvascular endothelium and neonatal brain lesions, Rouen, France, **C. Lardennois**, Department of Neonatal Pediatrics and Intensive Care, University Hospital, Rouen, France, **H. Bruel**, Department of Neonatal Pediatrics, Jacques Monod Hospital, Le Havre, France, **X. Durrmeyer**, Department of Neonatal Pediatrics and Intensive Care, CHI, CRC, Créteil, France, **M. Granier**, Department of Neonatal Pediatrics, Sud Francilien Hospital, Evry, France, **P. Boileau**, Department of Neonatal Pediatrics, University Hospital Poissy Saint Germain, Poissy, France, **G. Kayem**, Department of Obstetrics and Gynecology, University Hospital Armand-Trousseau, Assistance Publique Hôpitaux de Paris, Paris, France; Obstetrical, Perinatal and Pediatric Epidemiology Research Team (EPOPé), Center for Epidemiology and Statistics Sorbonne Paris Cité, INSERM UMR1153, DHU Risks in pregnancy, Paris Descartes University, France, **R. Carbajal**, Emergency Department, University Hospital Armand-Trousseau, Paris, France; Obstetrical, Perinatal and Pediatric Epidemiology Research Team (EPOPé), Center for Epidemiology and Statistics Sorbonne Paris Cité, INSERM UMR1153, DHU Risks in pregnancy, Paris Descartes University, France, **A. Lapillonne**, Department of Neonatology, University Hospital Necker, Assistance Publique Hôpitaux de Paris, Paris, France; Paris Descartes University, Paris, France, **PH. Jarreau**, Department of neonatal intensive care medicine, University Hospital Port-Royal, University Hospitals Paris Centre Site Cochin, Paris, France; University Paris V René Descartes and Assistance Publique Hôpitaux de Paris, Paris, France, **G. Cambonie**, Department of Neonatal Medicine, University Hospital Arnaud de Villeneuve, Montpellier, France, **I. Souksi-Médioni**, Department of Neonatal Medicine, University Hospital Caremeau, Nîmes, France, **AC. Menguy**, Department of Neonatal Medicine, St Jean Hospital, Perpignan, France, **A. Bédu**, Department of Neonatal Pediatrics and Intensive Care, University Hospital, Limoges, France, **F. Mons**, Department of Neonatal Pediatrics and Intensive Care, University Hospital, Limoges, France, **V. Valdes**, Department of Neonatal Pediatrics and Intensive Care, Adolphe Pinard Maternity Unit, Nancy, France, **J.**

**Fresson**, Réseau Périnatal Lorrain, Nancy, France; Department of Medical Information, University Hospital, Nancy, France, **C. Alberge**, Children Intensive Care unit, University Hospital, Toulouse, France. INSERM U1027, Toulouse, France; Paul-Sabatier University, Toulouse, France, **C. Arnaud**, INSERM U1027, Toulouse, France; Paul-Sabatier University, Toulouse, France, **O. Dicky**, Department of Neonatology, University Hospital, Toulouse, France, INSERM U1027, Toulouse, France; Paul-Sabatier University, Toulouse, France, **P. Truffert**, CHU Lille, Department of Neonatal Medicine, F-59000 Lille, France, **A. Mitha**, CHU Lille, Department of Neonatal Medicine, F-59000 Lille, France, **ML. Charkaluk**, Department of Neonatal Medicine, University hospital Saint Vincent de Paul, Groupement des Hôpitaux de l'Institut Catholique Lillois/Faculté de Médecine et Maïeutique, F-59000 Lille, France; INSERM UMR1153, Obstretical, Perinatal and Pediatric Epidemiology Research Team (EPOPé), Center for Epidemiology and Statistics Sorbonne Paris Cité, DHU Risks in Pregnancy, Paris Descartes University, Paris, France, **C. Gire**, Department of Neonatal Pediatrics and Intensive Care, University Hospital Nord, Marseille, France, **F. Boubred**, Department of Neonatal Pediatrics and Intensive Care, University Hospital Conception, Marseille, France, **C. D'Ercole**, Department of Gynecology and Obstetrics, University Hospital Nord, Marseille, France, **A. Bongain**, Department of Gynecology and Obstetrics, University Hospital, Nice, France, **JC. Rozé**, Department of Neonatology, University Hospital, Nantes, France, **C. Flamant**, Department of Neonatology, University Hospital, Nantes, France; Clinical Epidemiology and Biostatistics Department, Nantes University, INSERM CIC004, Nantes, France, **G. Gascoïn**, Department of Neonatal Medicine, University Hospital, Angers, France. **A. Leke**, Department of Neonatal Pediatrics and Intensive Care, University Hospital of Picardie, Amiens, France; PériTox UMI-01, University Jules Verne of Picardie, **S. Goudjil**, Department of Neonatal Pediatrics and Intensive Care, University Hospital of Picardie, Amiens, France; GRAMFC INSERM U1105, University Jules Verne of Picardie, Amiens, France, **M. Debeir**, Department of Pediatrics, Hospital Metropole-Savoie, Chambéry, France, **O. Claris**, Department of Neonatal Pediatrics and Intensive Care, University Hospital, Lyon, France, **JC. Picaud**, Department of Neonatology, University Hospital E. Herriot, Lyon, France; Human Nutrition Research Center, University Hospital E. Herriot, Lyon, France, **T. Debillon**, Neonatal Intensive Care Unit, University Hospital, Grenoble, France; Grenoble Alps University, CNRS, TIMC-IMAG, UMR5525 ThEMAS, F38041 Grenoble, France, **H. Patural**, Department of Neonatal and Pediatric Intensive Care, University Hospital, Saint-Étienne, France, **A. Poulichet**, Department of Neonatology, University Hospital of Pointe à Pitre, French West Indies, Guadeloupe, France, **A. Abrial**, Department of Neonatology, University Hospital of Pointe à Pitre, French West Indies, Guadeloupe, France, **A. Favre**, Department of Neonatal and Pediatric Intensive Care, Andrée Rosemon Hospital, Cayenne, Guyane, France, **S. Buende**, Department of neonatal medicine, Hospital of Saint Laurent du Maroni, Guyane, France, **O. Fléchelles**, Department of Neonatal Medicine, University Hospital, Fort de France, Martinique, France, **D. Ramful**, Pediatric and Neonatal Intensive Care Unit, University Hospital Félix Guyon, Saint-Denis, Reunion Island, France; INSERM, CIC1410, Saint-Pierre, Reunion Island, France **PY. Robillard**, Pediatric and Neonatal Intensive Care Unit, Sud Reunion University Hospital, Saint-Pierre, Reunion Island, France, **V. Benhammou**, Obstretical, Perinatal and Pediatric Epidemiology Research Team (EPOPé), Center for Epidemiology and Statistics Sorbonne Paris Cité, INSERM UMR1153, DHU Risks in pregnancy, Paris Descartes University, France, **L Foix-L'Hélias**, Obstretical, Perinatal and Pediatric Epidemiology Research Team (EPOPé), Center for Epidemiology and Statistics Sorbonne Paris Cité, INSERM UMR1153, DHU Risks in pregnancy, Paris Descartes University, France.

## **EPIPAGE-2 study group**

**Alsace:** D Astruc, P Kuhn, B Langer, J Matis (Strasbourg), C Ramousset; **Aquitaine:** X Hernandorena (Bayonne), P Chabanier, L Joly-Pedespan (Bordeaux), MJ Costedoat, A Leguen; **Auvergne:** B Lecomte, D Lemery, F Vendittelli (Clermont-Ferrand); **Basse-Normandie:** G Beucher, M Dreyfus, B Guillois (Caen), Y Toure; **Bourgogne:** A Burguet, S Couvreur, JB Gouyon, P Sagot (Dijon), N Colas; **Bretagne:** J Sizun (Brest), A Beuchée, P Pladys, F Rouget (Rennes), RP Dupuy (St-Brieuc), D Soupre (Vannes), F Charlot, S Roudaut; **Centre:** A Favreau, E Saliba (Tours), L Reboul; **Champagne-Ardenne:** N Bednarek, P Morville (Reims), V Verrière; **Franche-Comté:** G Thiriez (Besançon), C Balamou; **Haute-Normandie:** L Marpeau, S Marret (Rouen), C Barbier; **Ile-de-France:** G Kayem (Colombes), X Durrmeyer (Créteil), M Granier (Evry), M Ayoubi, A Baud, B Carbonne, L Foix L'Hélias, F Goffinet, PH Jarreau, D Mitanchez (Paris), P Boileau (Poissy), L Cornu, R Moras; **Languedoc-Roussillon:** P Boulot, G Cambonie, H Daudé (Montpellier), A Badessi, N Tsaoussis; **Limousin:** A Bédu, F Mons (Limoges), C Bahans; **Lorraine:** MH Binet, J Fresson, JM Hascoët, A Milton, O Morel, R Vieux (Nancy), L Hilpert; **Midi-Pyrénées:** C Alberge, C Arnaud, C Vayssière (Toulouse), M Baron; **Nord-Pas-de-Calais:** ML Charkaluk, V Pierrat, D Subtil, P Truffert (Lille), S Akowanou, D Roche; **Provence Alpes Côte d'Azur et Corse:** C D'Ercole, C Gire, U Simeoni (Marseille), A Bongain (Nice), M Deschamps; **Pays de Loire:** B Branger (FFRSP), JC Rozé, N Winer (Nantes), V Rouger, C Dupont; **Picardie:** J Gondry, G Krim (Amiens), B Baby; **Rhône-Alpes:** M Debeir (Chambéry), O Claris, JC Picaud, S Rubio-Gurung (Lyon), C Cans, A Ego, T Debillon (Grenoble), H Patural (Saint-Etienne), A Rannaud; **Guadeloupe:** E Janky, A Poulichet, JM Rosenthal (Point à Pitre), E Coliné; **Guyane:** A Favre (Cayenne), N Joly; **Martinique:** S Châlons (Fort de France), V Lochelongue; **La Réunion :** PY Robillard (Saint-Pierre), S Samperiz, D Ramful (Saint-Denis).

**Inserm UMR 1153:** PY Ancel, V Benhammou, B Blondel, M Bonet, A Brinis, ML Charkaluk, A Coquelin, C Duffaut, M Durox, L Foix-L'Hélias, F Goffinet, M Kaminski, G Kayem, B Khoshnood, C Lebeaux, E Lorthe, L Marchand-Martin, AS Morgan, V Pierrat, J Rousseau, MJ Saurel-Cubizolles, D Sylla, D Tran, L Vasante-Annamale, J Zeitlin.
